# Supplementary material
Source: publisher site journal article supplement (https://www.dovepress.com/article/298743)
Supplement: Supplementary file 1 [file get_supplementary_file.php]

**Table S1. Time Table of UPLC-MRM-MSMS**

| <b>Time</b> | <b>A (H<sub>2</sub>O)</b> | <b>B (ACN)</b> | <b>Flow</b> |
|-------------|---------------------------|----------------|-------------|
| 0.00 min    | 17.00%                    | 83.00%         | 0.40 mL/min |
| 1.50 min    | 17.00%                    | 83.00%         | 0.40 mL/min |
| 4.00 min    | 25.00%                    | 75.00%         | 0.40 mL/min |
| 6.00 min    | 50.00%                    | 50.00%         | 0.40 mL/min |
| 8.50 min    | 50.00%                    | 50.00%         | 0.40 mL/min |
| 9.00 min    | 17.00%                    | 83.00%         | 0.40 mL/min |
| 13.00 min   | 17.00%                    | 83.00%         | 0.40 mL/min |

**Table S2. MRM Parameters-UPLC-MRM-MS/MS**

| <b>Compound Name</b> | <b>Prec Ion</b> | <b>Prod Ion</b> | <b>Frag (V)</b> | <b>CE (V)</b> | <b>Polarity</b> | <b>Quantifier/Qualifier</b> |
|----------------------|-----------------|-----------------|-----------------|---------------|-----------------|-----------------------------|
| Glycine              | 76.1            | 30.2            | 75              | 6             | Positive        | Quantifier/Qualifier        |
| Beta-Alanine         | 90.1            | 72.1            | 50              | 3             | Positive        | Quantifier                  |
| Beta-Alanine         | 90.1            | 30.1            | 50              | 8             | Positive        | Qualifier                   |
| L-Alanine            | 90.1            | 44.1            | 50              | 7             | Positive        | Quantifier/Qualifier        |
| 4-Aminobutyric acid  | 104.1           | 87.1            | 50              | 7             | Positive        | Quantifier                  |
| 4-Aminobutyric acid  | 104.1           | 69.1            | 50              | 15            | Positive        | Qualifier                   |
| L-Serine             | 106.1           | 88.1            | 50              | 5             | Positive        | Qualifier                   |
| L-Serine             | 106.1           | 60.1            | 50              | 9             | Positive        | Quantifier                  |
| L-Proline            | 116.1           | 70.2            | 90              | 15            | Positive        | Quantifier/Qualifier        |
| L-Valine             | 118.1           | 72.1            | 80              | 9             | Positive        | Quantifier                  |
| L-Valine             | 118.1           | 55.1            | 80              | 17            | Positive        | Qualifier                   |
| L-Threonine          | 120.1           | 74.1            | 50              | 9             | Positive        | Quantifier                  |
| L-Threonine          | 120.1           | 56.1            | 50              | 17            | Positive        | Qualifier                   |
| 4-Hydroxyproline     | 132.1           | 86.0            | 85              | 13            | Positive        | Quantifier                  |
| 4-Hydroxyproline     | 132.1           | 68.1            | 85              | 19            | Positive        | Qualifier                   |
| L-Asparagine         | 133.1           | 116.0           | 80              | 5             | Positive        | Qualifier                   |
| L-Asparagine         | 133.1           | 87.0            | 80              | 5             | Positive        | Quantifier                  |
| L-Ornithine          | 133.1           | 116.0           | 75              | 5             | Positive        | Qualifier                   |
| L-Ornithine          | 133.1           | 70.0            | 75              | 18            | Positive        | Quantifier                  |
| L-Aspartic acid      | 134.1           | 116.0           | 40              | 4             | Positive        | Qualifier                   |
| L-Aspartic acid      | 134.1           | 88.1            | 40              | 6             | Positive        | Quantifier                  |
| L-Glutamine          | 147.1           | 130.0           | 45              | 5             | Positive        | Quantifier                  |
| L-Glutamine          | 147.1           | 84.1            | 45              | 20            | Positive        | Qualifier                   |
| L-Lysine             | 147.1           | 130.0           | 45              | 5             | Positive        | Qualifier                   |
| L-Lysine             | 147.1           | 84.1            | 45              | 17            | Positive        | Quantifier                  |
| L-Glutamic acid      | 148.1           | 130.0           | 55              | 8             | Positive        | Qualifier                   |
| L-Glutamic acid      | 148.1           | 84.1            | 55              | 15            | Positive        | Quantifier                  |
| L-Methionine         | 150.1           | 104.0           | 55              | 8             | Positive        | Quantifier                  |
| L-Methionine         | 150.1           | 56.1            | 55              | 17            | Positive        | Qualifier                   |
| L-Histidine          | 156.1           | 110.0           | 65              | 11            | Positive        | Quantifier                  |
| L-Histidine          | 156.1           | 93.0            | 65              | 24            | Positive        | Qualifier                   |
| 5-Hydroxylysine      | 163.1           | 128.0           | 55              | 7             | Positive        | Quantifier                  |
| 5-Hydroxylysine      | 163.1           | 82.0            | 55              | 16            | Positive        | Qualifier                   |
| L-Phenylalanine      | 166.1           | 120.0           | 70              | 10            | Positive        | Quantifier                  |
| L-Phenylalanine      | 166.1           | 77.1            | 70              | 40            | Positive        | Qualifier                   |
| 1-Methyl-L-histidine | 170.1           | 124.0           | 65              | 11            | Positive        | Quantifier                  |
| 1-Methyl-L-histidine | 170.1           | 83.0            | 65              | 25            | Positive        | Qualifier                   |
| 3-Methyl-L-histidine | 170.1           | 126.0           | 70              | 12            | Positive        | Qualifier                   |
| 3-Methyl-L-histidine | 170.1           | 96.0            | 70              | 20            | Positive        | Quantifier                  |
| L-Arginine           | 175.1           | 116.0           | 60              | 14            | Positive        | Qualifier                   |
| L-Arginine           | 175.1           | 70.0            | 60              | 16            | Positive        | Quantifier                  |
| L-Citrulline         | 176.1           | 159.0           | 55              | 5             | Positive        | Quantifier                  |
| L-Citrulline         | 176.1           | 113.0           | 55              | 15            | Positive        | Qualifier                   |
| L-Tyrosine           | 182.1           | 136.0           | 74              | 10            | Positive        | Quantifier                  |
| L-Tyrosine           | 182.1           | 91.0            | 74              | 30            | Positive        | Qualifier                   |
| L-Tryptophan         | 205.1           | 188.0           | 70              | 6             | Positive        | Quantifier                  |

---

|              |       |       |    |    |          |           |
|--------------|-------|-------|----|----|----------|-----------|
| L-Tryptophan | 205.1 | 146.0 | 70 | 18 | Positive | Qualifier |
|--------------|-------|-------|----|----|----------|-----------|

---

Table S3. Calibration of UPLC-MRM-MSMS

| Compound Name       | LLOD (nmol/L) | LLOQ (nmol/L) | R <sup>2</sup> |
|---------------------|---------------|---------------|----------------|
| L-Tryptophan        | 78.13         | 156.25        | 0.9987         |
| L-Phenylalanine     | 2.44          | 4.88          | 0.9997         |
| L-Valine            | 12.21         | 24.41         | 0.9996         |
| L-Methionine        | 2.44          | 4.88          | 0.9993         |
| 4-Aminobutyric acid | 4.88          | 9.77          | 0.9999         |
| L-Tyrosine          | 19.53         | 39.06         | 0.9998         |
| L-Proline           | 78.13         | 156.25        | 0.9992         |
| Beta-Alanine        | 39.06         | 78.13         | 0.9995         |
| Glycine             | 78.13         | 312.50        | 0.9984         |
| 4-Hydroxyproline    | 39.06         | 78.13         | 0.9967         |
| L-Glutamic acid     | 78.13         | 156.25        | 0.9995         |
| L-Threonine         | 87.89         | 703.13        | 0.9990         |
| L-Aspartic acid     | 19.53         | 39.06         | 0.9999         |
| L-Asparagine        | 78.13         | 312.50        | 0.9983         |
| L-Citrulline        | 39.06         | 78.13         | 0.9997         |
| 1-Methyl-L-histidin | 78.13         | 156.25        | 0.9995         |
| L-Arginine          | 39.06         | 78.13         | 0.9991         |
| 3-Methyl-L-histidin | 4.88          | 9.77          | 0.9999         |
| L-Histidine         | 4.88          | 9.77          | 0.9998         |
| L-Ornithine         | 39.06         | 78.13         | 0.9996         |
| 5-Hydroxylysine     | 4.88          | 9.77          | 0.9996         |
| L-Alanine           | 61.04         | 488.28        | 0.9995         |
| L-Glutamine         | 24.41         | 48.83         | 0.9988         |
| L-Serine            | 21.97         | 43.95         | 0.9996         |
| L-Lysine            | 97.66         | 1562.50       | 0.9988         |

**L-Tryptophan**

L-Tryptophan - 16 Levels, 9 Levels Used, 16 Points, 9 Points Used, 14 QCs

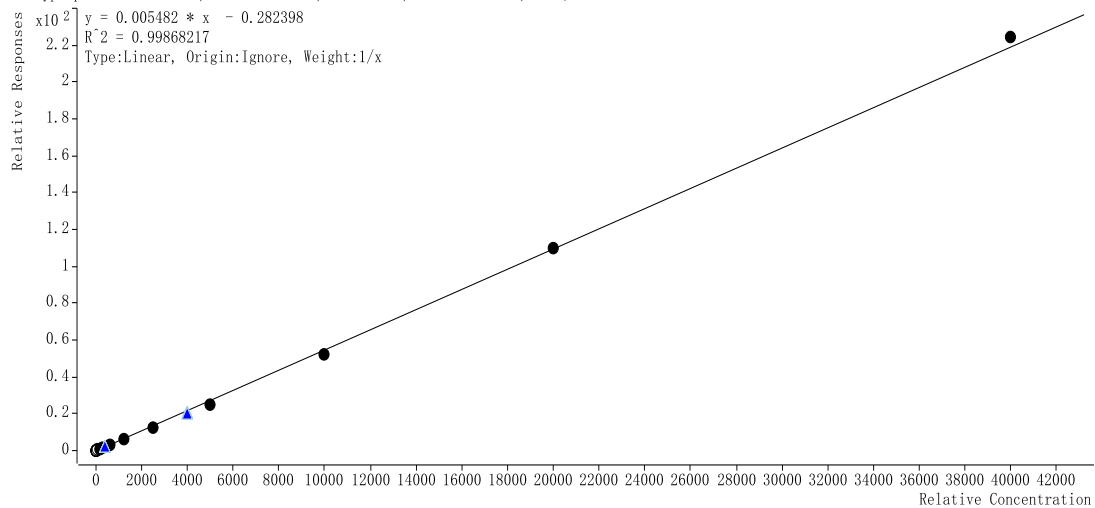

## L-Phenylalanine

L-Phenylalanine - 16 Levels, 14 Levels Used, 16 Points, 14 Points Used, 14 QCs

$$y = 0.003929 * x + 0.005563$$

$$R^2 = 0.99969792$$

Type:Linear, Origin:Ignore, Weight:1/x

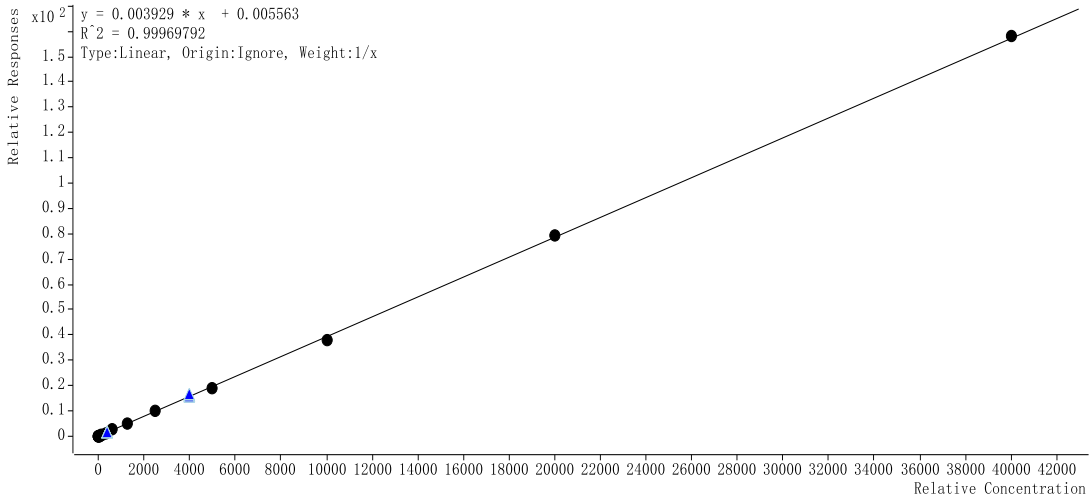

## L-Valine

L-Valine - 16 Levels, 13 Levels Used, 16 Points, 13 Points Used, 14 QCs

$$y = 0.005304 * x + 0.010507$$

$$R^2 = 0.99957049$$

Type:Linear, Origin:Ignore, Weight:1/x

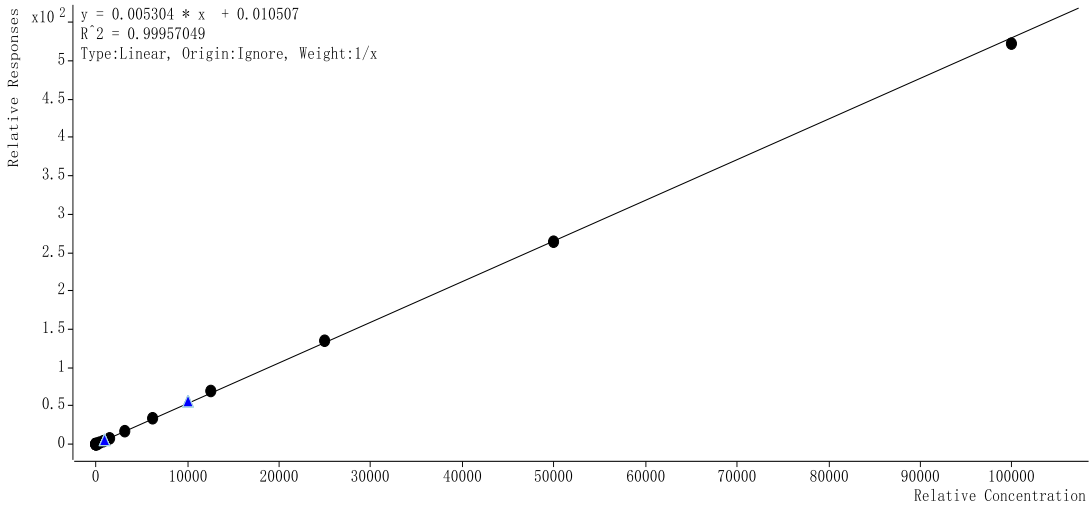

## L-Methionine

L-Methionine - 16 Levels, 14 Levels Used, 16 Points, 14 Points Used, 14 QCs

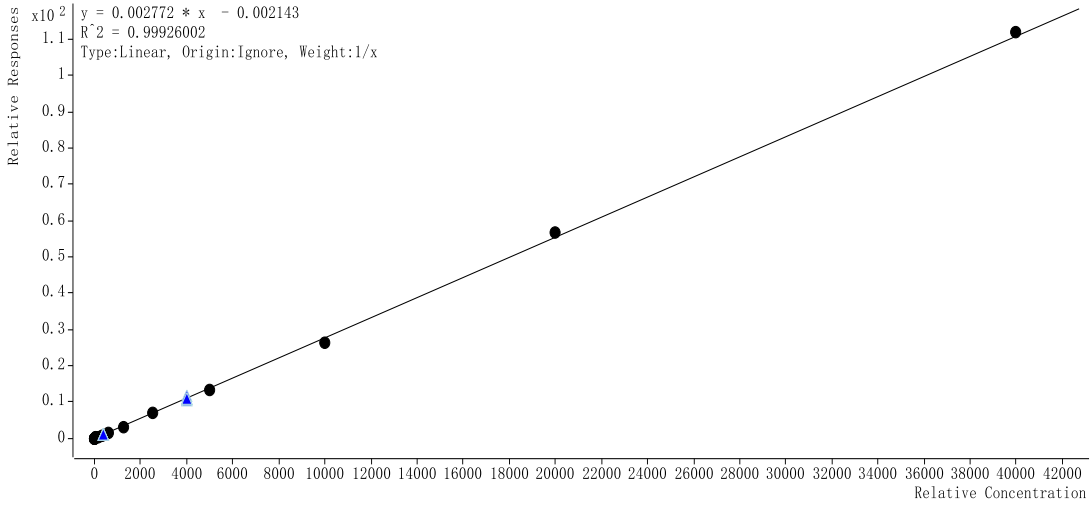

## 4-Aminobutyric acid

4-Aminobutyric acid - 16 Levels, 10 Levels Used, 16 Points, 10 Points Used, 14 QCs

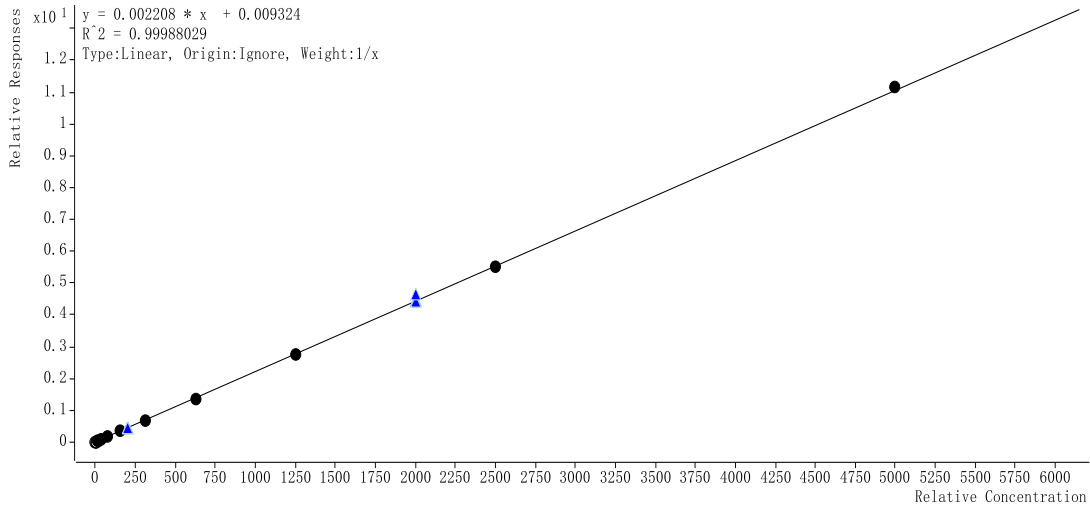

## L-Tyrosine

L-Tyrosine - 16 Levels, 11 Levels Used, 16 Points, 11 Points Used, 14 QCs

$y = 8.813017E-009 * x^2 + 0.001622 * x - 0.009853$   
 $R^2 = 0.99977702$   
Type:Quadratic, Origin:Ignore, Weight:1/x

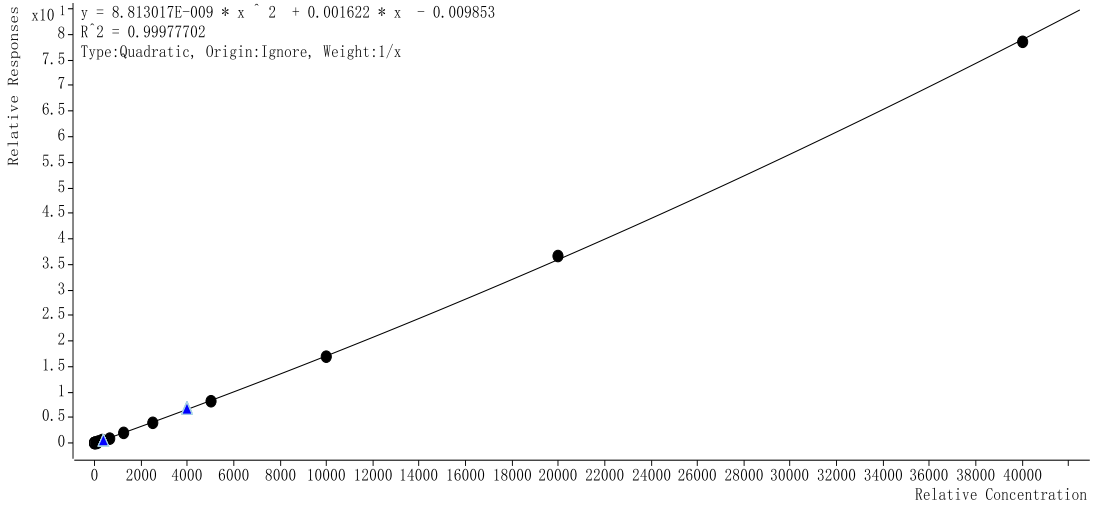

## L-Proline

L-Proline - 16 Levels, 9 Levels Used, 16 Points, 9 Points Used, 14 QCs

$y = 2.834176E-008 * x^2 + 0.005170 * x - 0.274844$   
 $R^2 = 0.99920940$   
Type:Quadratic, Origin:Ignore, Weight:1/x

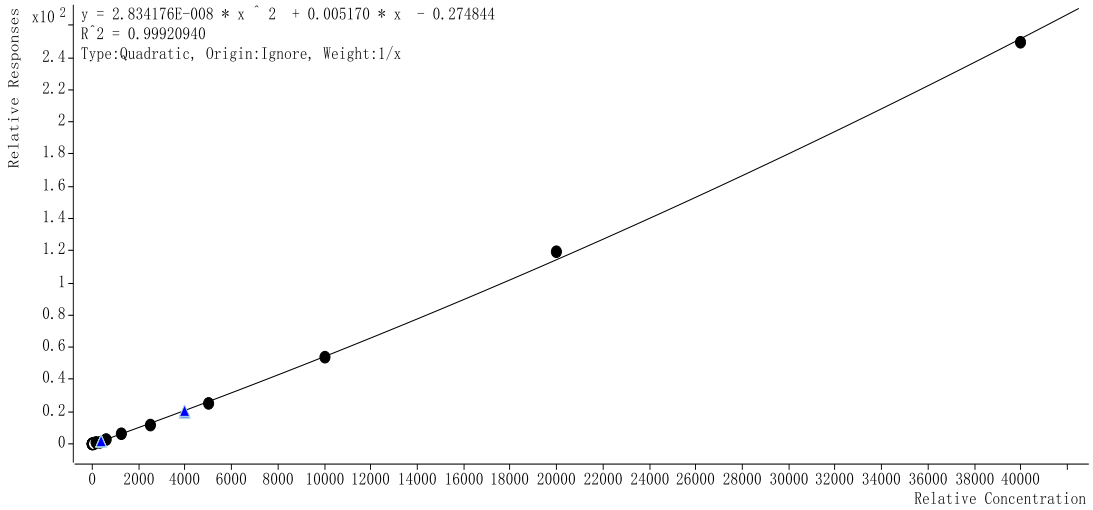

## Beta-Alanine

Beta-Alanine - 16 Levels, 7 Levels Used, 16 Points, 7 Points Used, 14 QCs

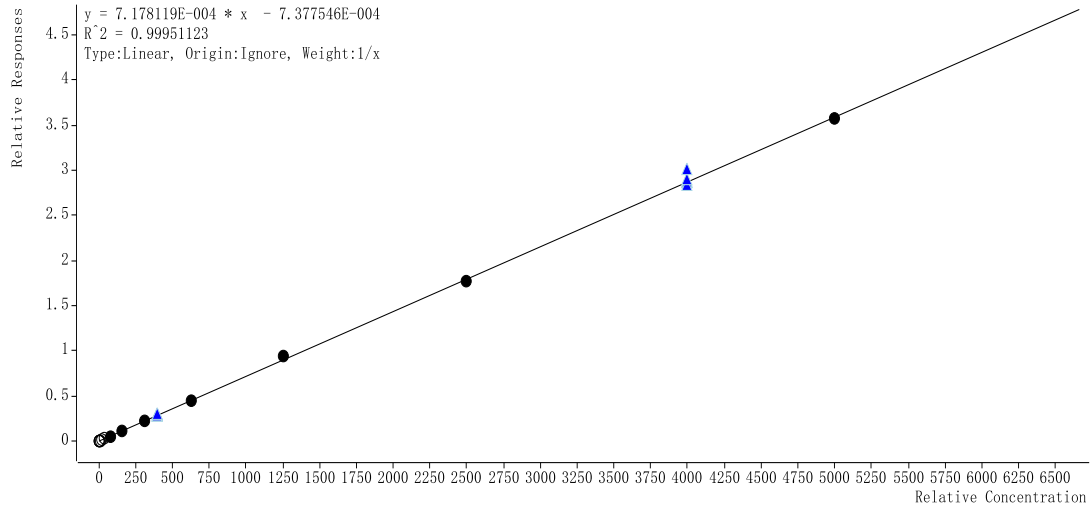

## Glycine

Glycine - 16 Levels, 8 Levels Used, 16 Points, 8 Points Used, 14 QCs

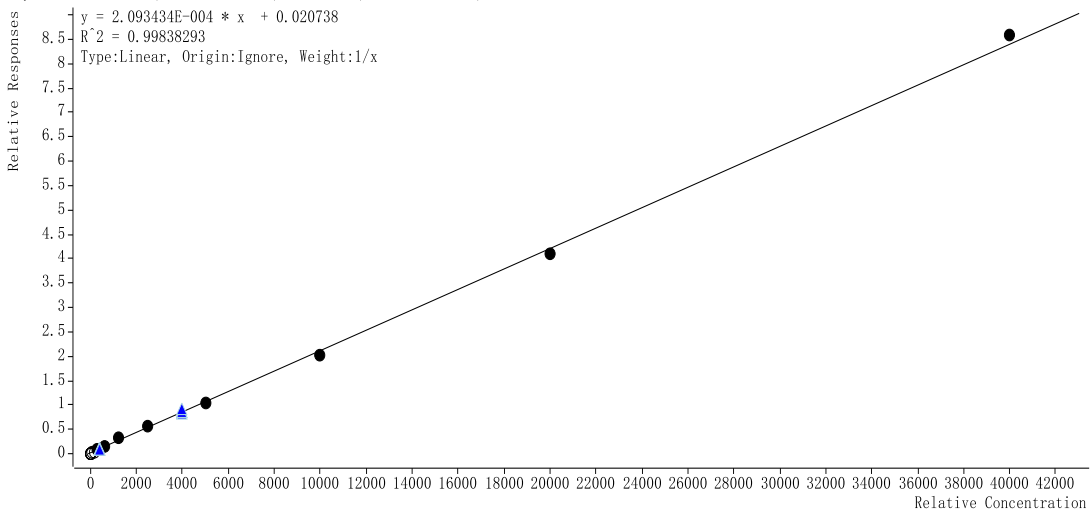



### 4-Hydroxyproline

4-Hydroxyproline - 16 Levels, 7 Levels Used, 16 Points, 7 Points Used, 14 QCs

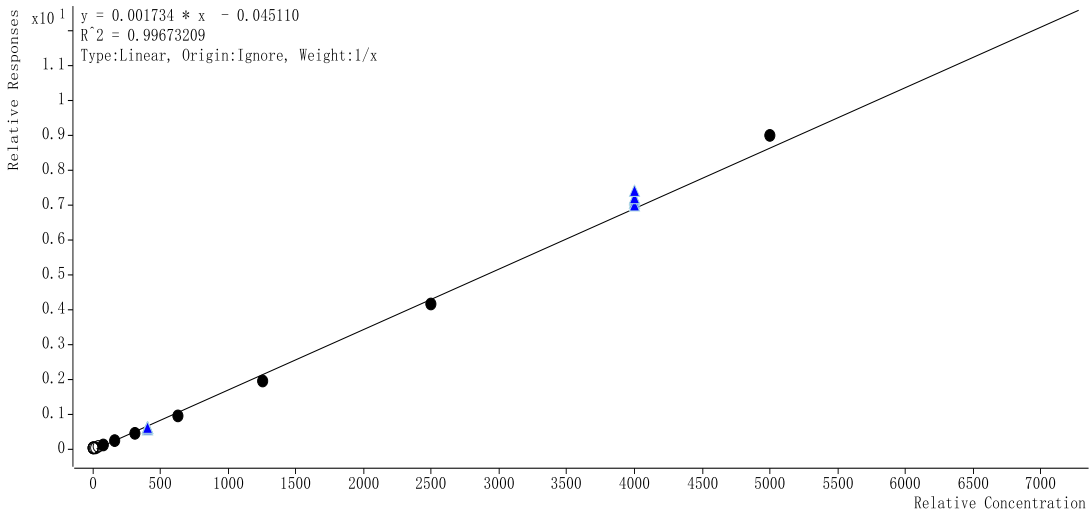

### L-Glutamic acid

L-Glutamic acid - 16 Levels, 10 Levels Used, 16 Points, 10 Points Used, 14 QCs

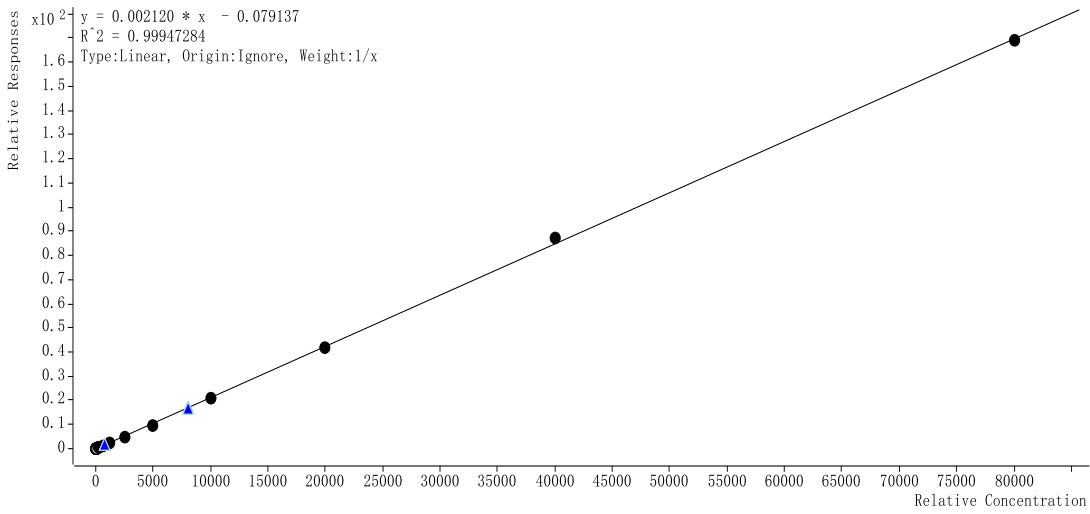

### L-Threonine

L-Threonine - 16 Levels, 8 Levels Used, 16 Points, 8 Points Used, 14 QCs

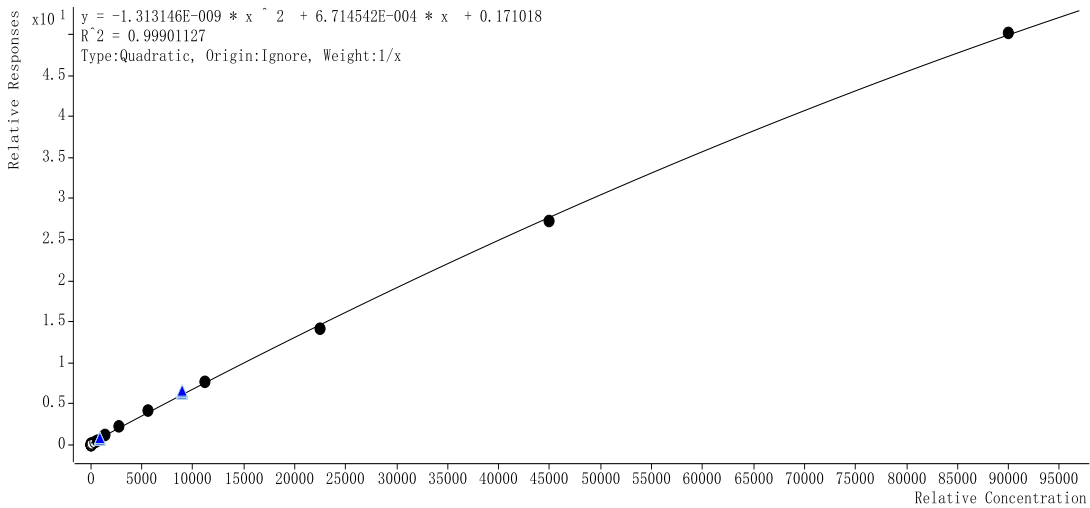

### L-Aspartic acid

L-Aspartic acid - 16 Levels, 10 Levels Used, 16 Points, 10 Points Used, 14 QCs

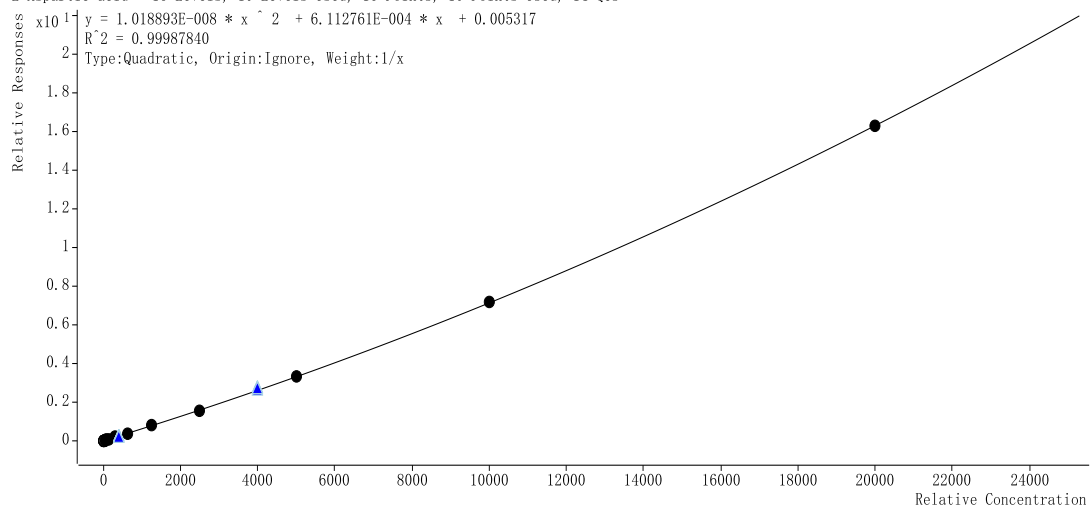

## L-Asparagine

L-Asparagine - 16 Levels, 8 Levels Used, 16 Points, 8 Points Used, 14 QCs

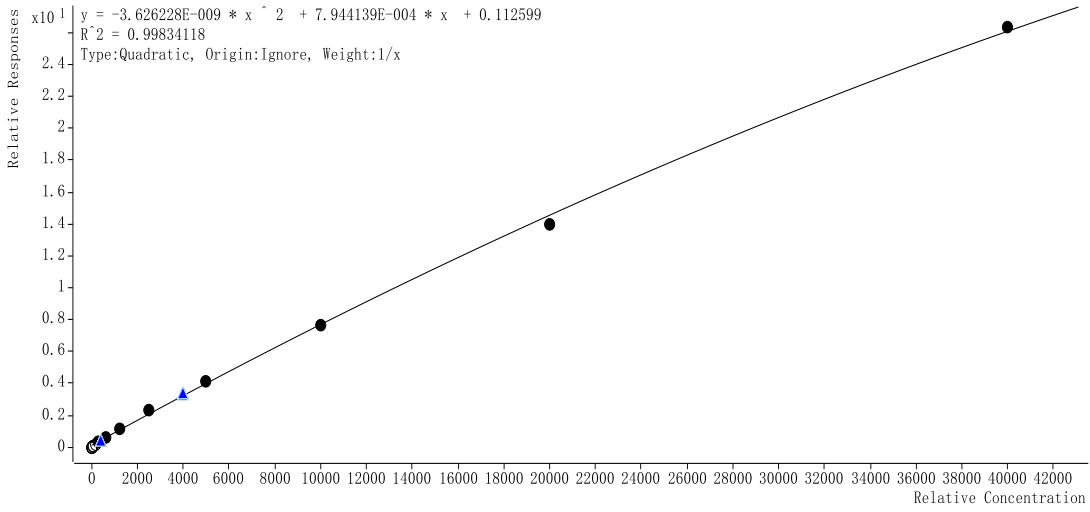

## L-Citrulline

L-Citrulline - 16 Levels, 10 Levels Used, 16 Points, 10 Points Used, 14 QCs

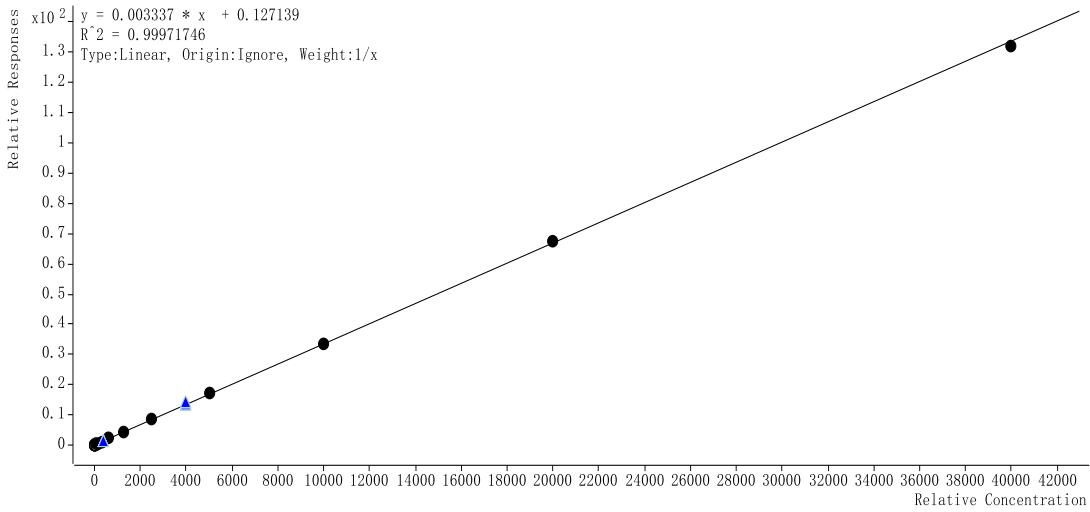

### 1-Methyl-L-histidine

1-Methyl-L-histidine - 16 Levels, 9 Levels Used, 16 Points, 9 Points Used, 14 QCs

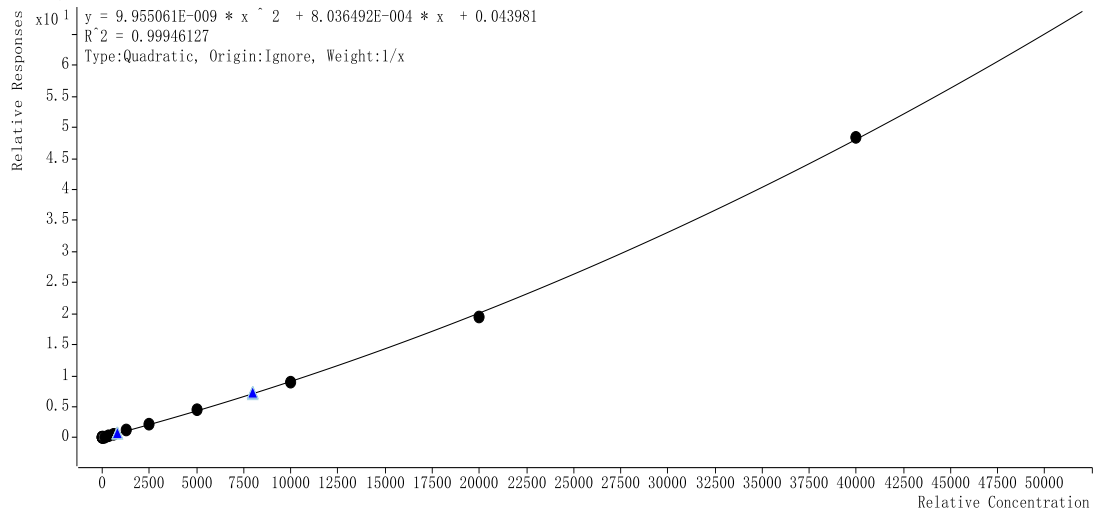

### L-Arginine

L-Arginine - 16 Levels, 10 Levels Used, 16 Points, 10 Points Used, 14 QCs

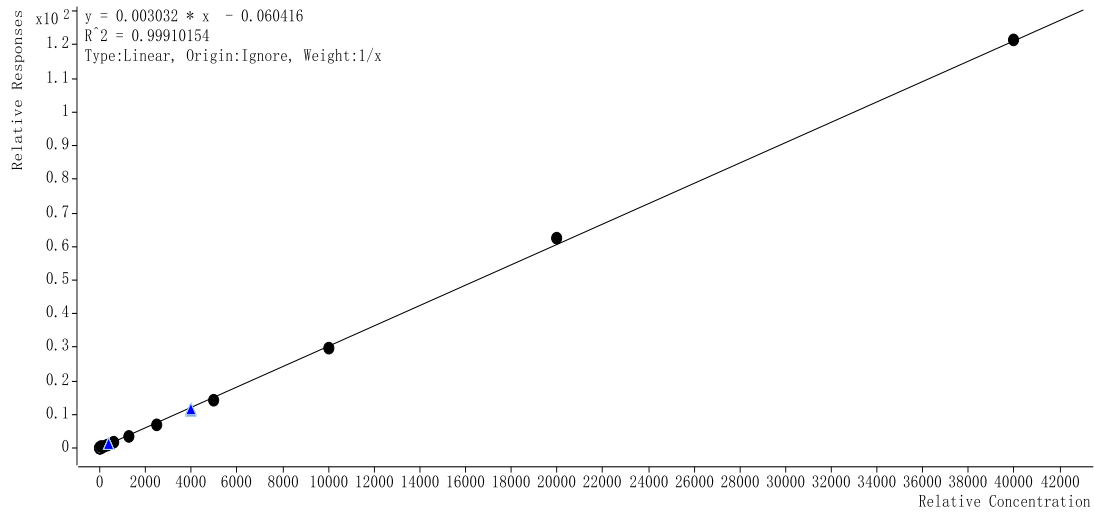

### 3-Methyl-L-histidine

3-Methyl-L-histidine - 16 Levels, 10 Levels Used, 16 Points, 10 Points Used, 14 QCs

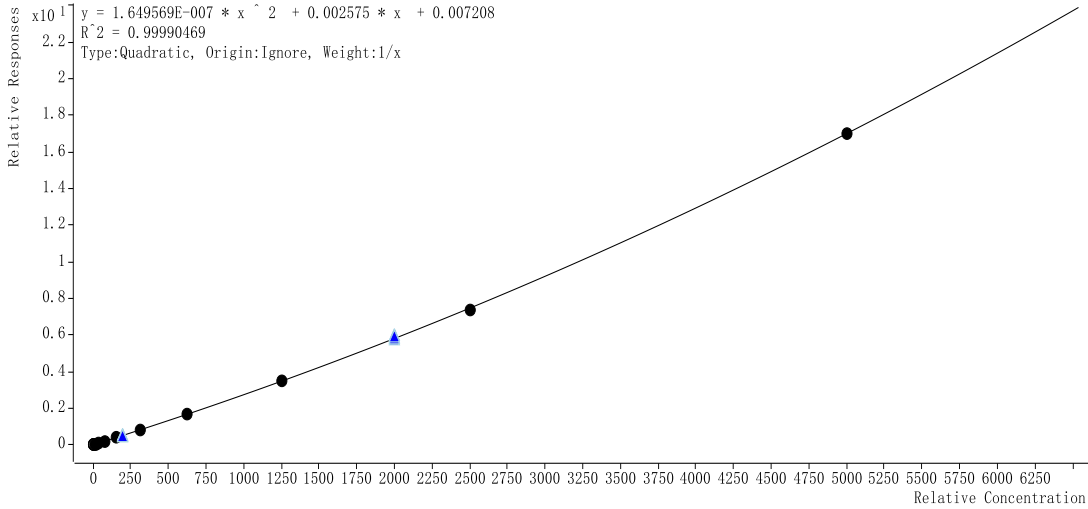

### L-Histidine

L-Histidine - 16 Levels, 14 Levels Used, 16 Points, 14 Points Used, 14 QCs

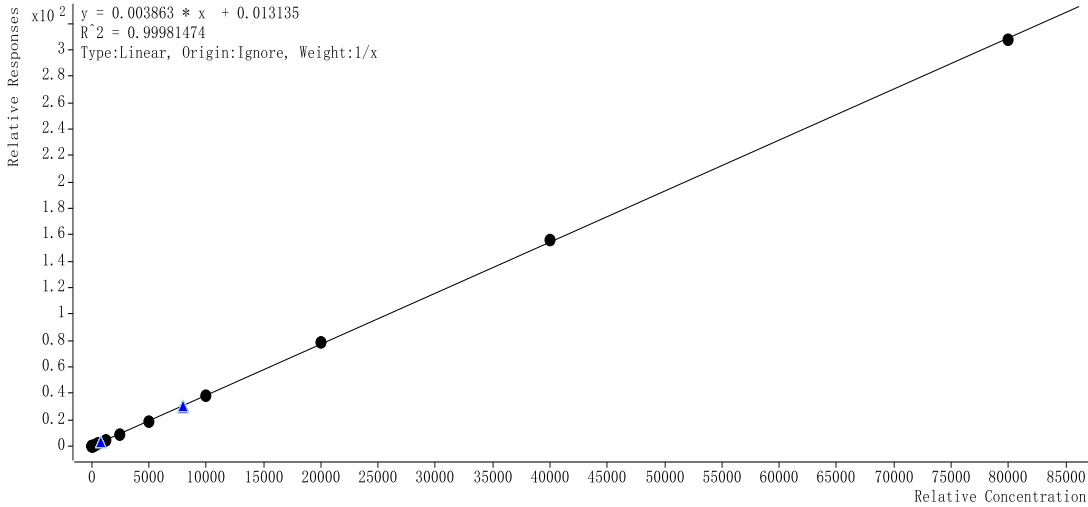

### L-Ornithine

L-Ornithine - 16 Levels, 11 Levels Used, 16 Points, 11 Points Used, 14 QCs

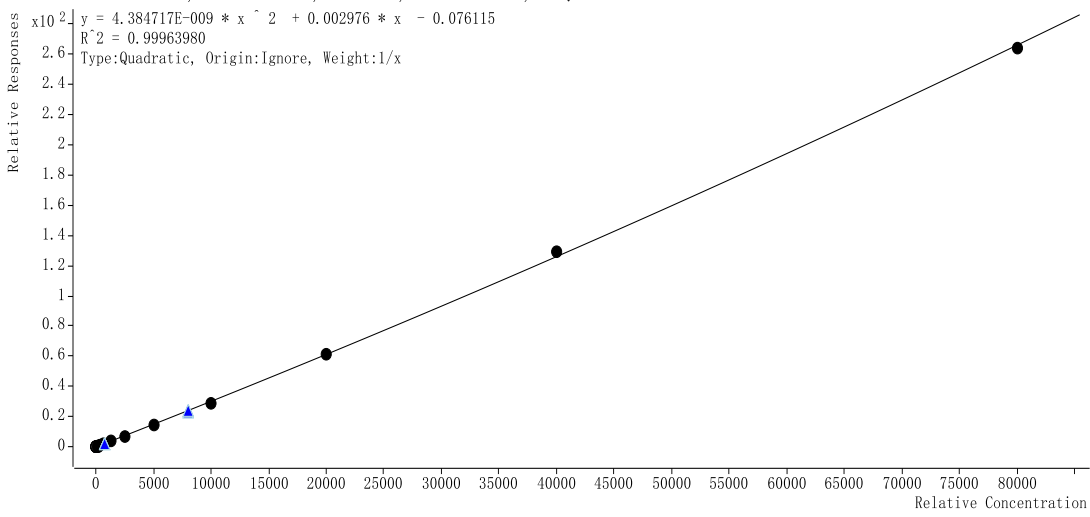

### 5-Hydroxylysine

5-Hydroxylysine - 16 Levels, 11 Levels Used, 16 Points, 11 Points Used, 14 QCs

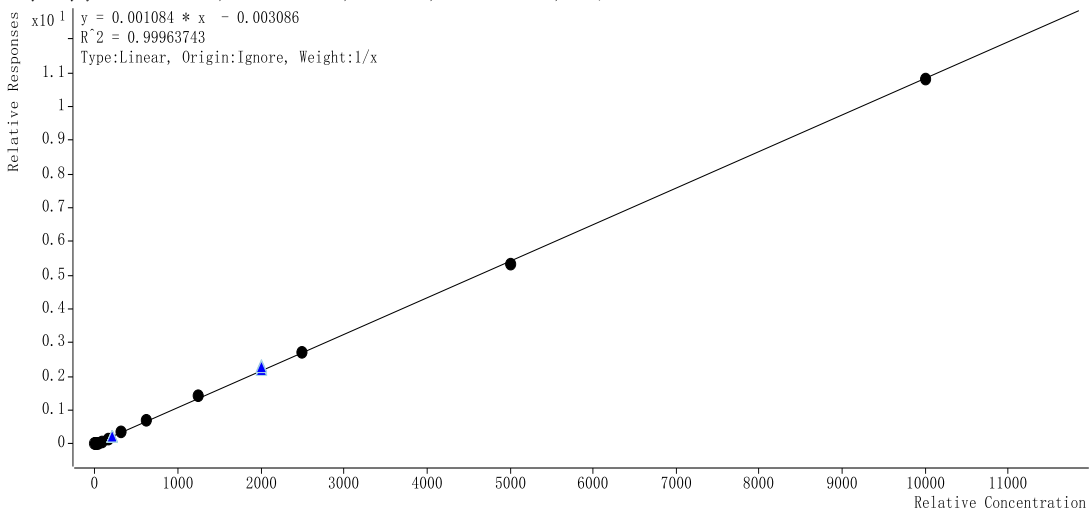

## L-Alanine

L-Alanine - 16 Levels, 10 Levels Used, 16 Points, 10 Points Used, 14 QCs

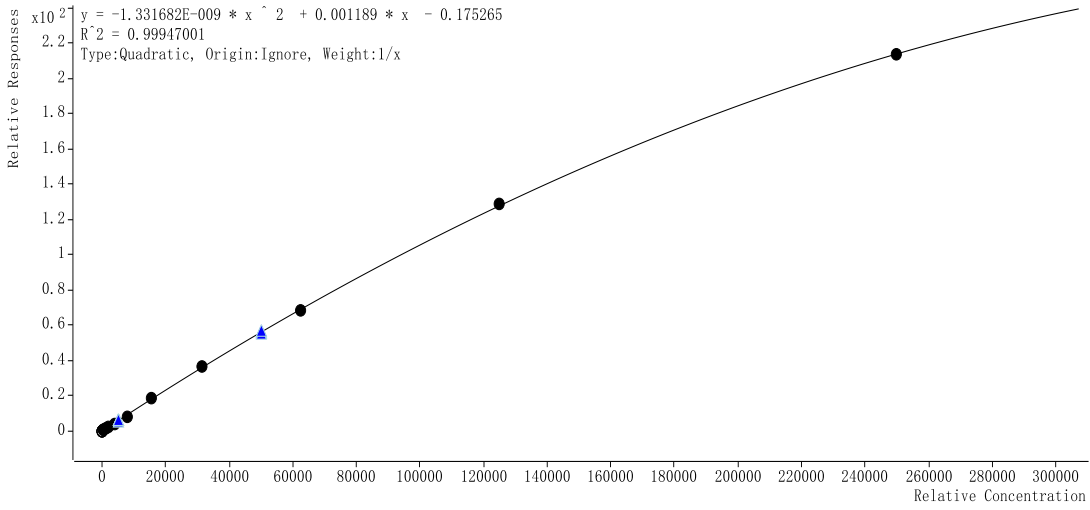

## L-Glutamine

L-Glutamine - 16 Levels, 11 Levels Used, 16 Points, 11 Points Used, 14 QCs

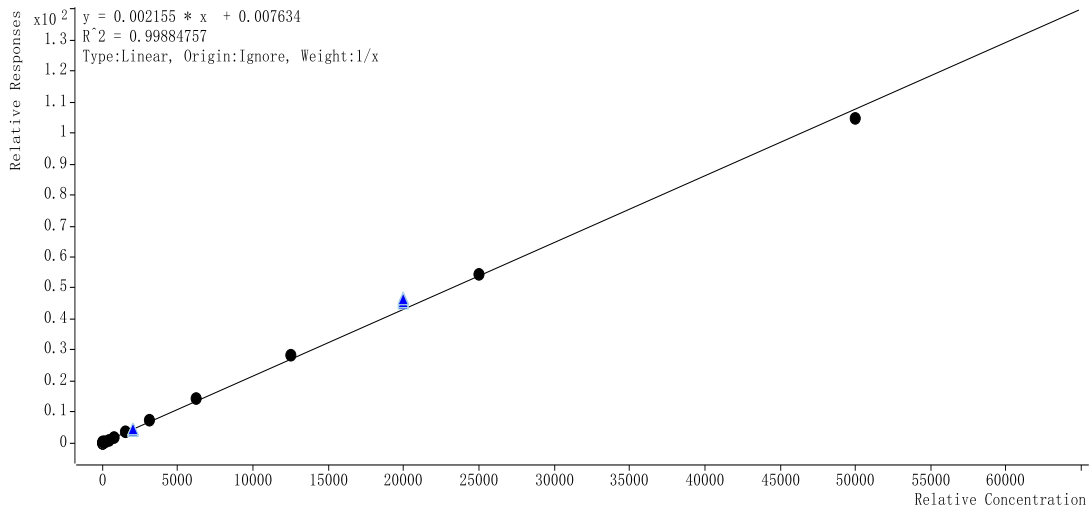

## L-Serine

L-Serine - 16 Levels, 12 Levels Used, 16 Points, 12 Points Used, 14 QCs

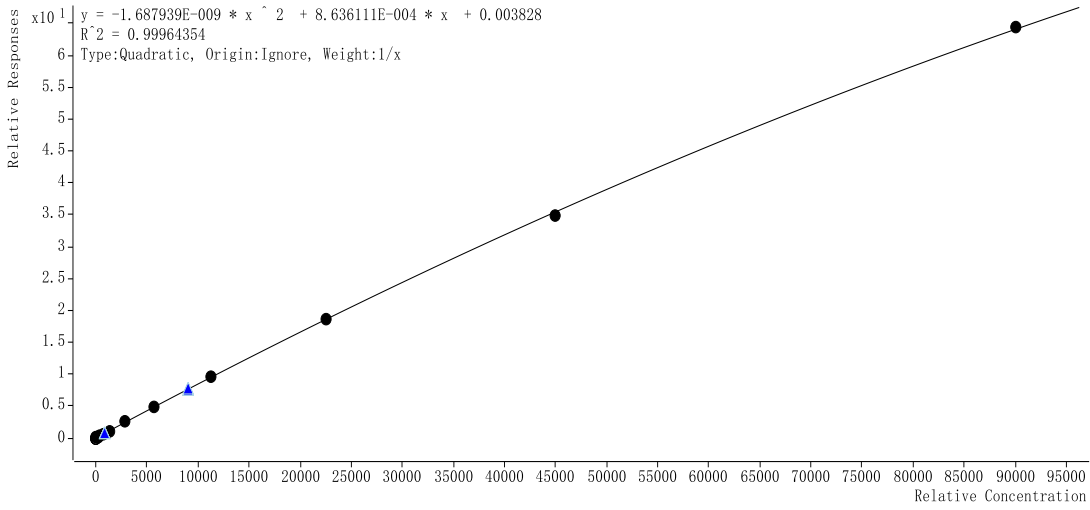

## L-Lysine

L-Lysine - 16 Levels, 8 Levels Used, 16 Points, 8 Points Used, 14 QCs

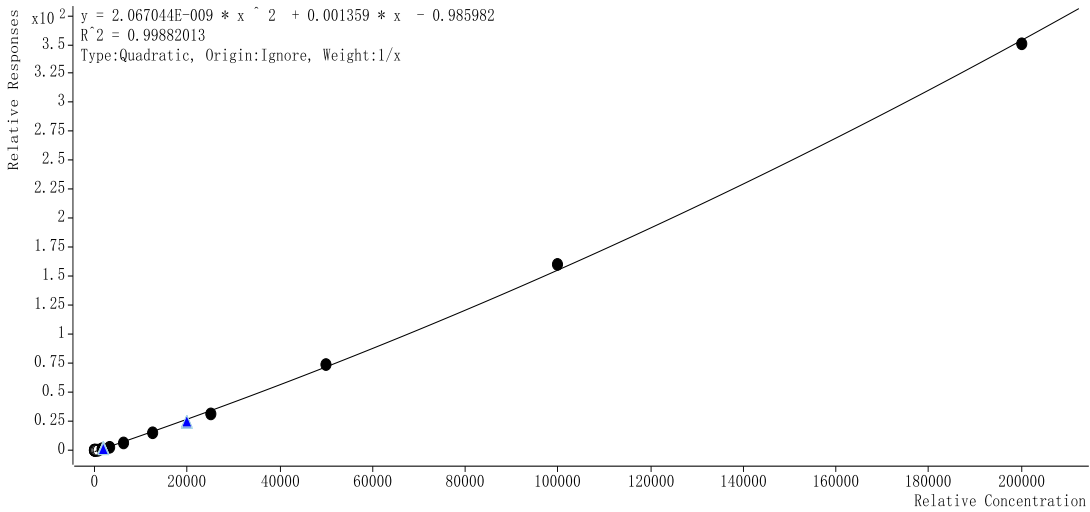



**Table S4. Recovery and RSD of UHPLC-MS-MS**

| <b>Compound Name</b> | <b>Concentration (nmol/L)</b> | <b>Recovery</b> | <b>RSD</b> |
|----------------------|-------------------------------|-----------------|------------|
| L-Tryptophan         | 4000.00                       | 95.2            | 1.4%       |
| L-Phenylalanine      | 4000.00                       | 102.1           | 2.0%       |
| L-Valine             | 10000.00                      | 106.2           | 1.0%       |
| L-Methionine         | 4000.00                       | 99.5            | 3.5%       |
| 4-Aminobutyric acid  | 2000.00                       | 101.6           | 1.9%       |
| L-Tyrosine           | 4000.00                       | 103.6           | 1.4%       |
| L-Proline            | 4000.00                       | 95.9            | 2.2%       |
| Beta-Alanine         | 4000.00                       | 101.2           | 2.2%       |
| Glycine              | 4000.00                       | 101.9           | 3.5%       |
| 4-Hydroxyproline     | 4000.00                       | 104.2           | 2.0%       |
| L-Glutamic acid      | 8000.00                       | 99.8            | 1.1%       |
| L-Threonine          | 9000.00                       | 105.3           | 2.1%       |
| L-Aspartic acid      | 4000.00                       | 105.4           | 1.4%       |
| L-Asparagine         | 4000.00                       | 105.3           | 1.6%       |
| L-Citrulline         | 4000.00                       | 103.9           | 2.5%       |
| 1-Methyl-L-histidine | 8000.00                       | 101.8           | 1.5%       |
| L-Arginine           | 4000.00                       | 95.2            | 1.9%       |
| 3-Methyl-L-histidine | 2000.00                       | 101.7           | 1.7%       |
| L-Histidine          | 8000.00                       | 98.6            | 1.7%       |
| L-Ornithine          | 8000.00                       | 98.5            | 1.7%       |
| 5-Hydroxylysine      | 2000.00                       | 104.3           | 1.3%       |
| L-Alanine            | 50000.00                      | 100.7           | 0.6%       |
| L-Glutamine          | 20000.00                      | 106.1           | 1.2%       |
| L-Serine             | 9000.00                       | 100.0           | 1.4%       |
| L-Lysine             | 20000.00                      | 91.3            | 2.0%       |
